# Supplementary material for: Risk of Postpartum Relapse in Bipolar Disorder and Postpartum Psychosis: A Systematic Review and Meta-Analysis
Source: Atypon-hosted journal article supplement (doi:10.1176/appi.ajp.2015.15010124), 2015-10-30

## Search, Selection, and Data Extraction Procedures

### *Literature search*

A systematic electronic literature search was performed by a medical information specialist on August 26<sup>th</sup> 2013 in all large medical electronic databases: Embase, MEDLINE, Cochrane, Web-Of-Science, PsycINFO and Google Scholar. The following search terms were used: “risk”, “relapse”, “recurrent”, “recur\*”, “bipolar disorder”, “bipolar”, “bipolar\*”, “manic”, “mania”, “pregnancy”, “pregnant”, “puerperium”, “pregnan\*” “puerper\*”, “puerperal disorder”, “post natal”, “postnatal”, “postnatal care”, “perinatal period”, “perinatal care”, “puerperal psychosis”, “post partum”, “postpartum”, “psychosis”, “puerperal psychosis”, “psycho\*” and “English”. Exclusion search terms were: “conference”, “abstract”, “conference paper”, “conference review”, “editorial”, “erratum”, “case study”, and “case report”. On January 6<sup>th</sup> and November 11<sup>th</sup> 2014, search updates were performed to locate publications after the initial search. Furthermore, relevant textbooks and bibliographies of reviews and retrieved papers were searched to identify any additional papers.

All papers were handled and screened for duplicates with the citation manager EndNote (1). At first, papers eligible for inclusion were screened in an inter-rater session. Two reviewers (RW and AMK) independently screened all titles and abstracts for eligibility, after which full text articles were assessed. Mismatches between these reviewers were discussed with an independent psychiatrist (VB). Inter-rater agreement was calculated, by which a kappa of 0.61-0.80 reflected substantial, and a kappa of 0.81-1.00 nearly perfect, agreement (2).

When data was reported in an inconclusive format, the full text of the paper was screened for additional clarification. If necessary, authors were contacted to request additional data. If more papers published about the same cohort, the most complete/recent publication was included in the quantitative synthesis.

## References

1. EndNote X5.0.1 Thomson Reuters 1988-2014.
2. Viera AJ, Garrett JM. Understanding interobserver agreement: the kappa statistic. Fam Med. 2005;37:360-363.

**TABLE S1. Overview Characteristics Included Studies Qualitative Synthesis (N=48)**

| Study <sup>a</sup>                     | Patients included (n) | Event rate <sup>b,c</sup>    | Outcome    | Diagnosis <sup>d</sup> | Study Design I <sup>e</sup> | Study Design II | Duration follow up in months | Inclusion criteria | Relapse criteria   | Missing data reported | Medication use during pregnancy | Medication use postpartum    | Cohort                         | Time Frame  |
|----------------------------------------|-----------------------|------------------------------|------------|------------------------|-----------------------------|-----------------|------------------------------|--------------------|--------------------|-----------------------|---------------------------------|------------------------------|--------------------------------|-------------|
| <b>Akdinez 2003 (1)</b>                | 72                    | <u>26/160</u>                | incidence  | BD                     | R                           | cohort          | 1                            | DSM IV             | Clinical interview | yes                   | n.a.                            | n.a.                         | Istanbul, TR                   | n.a.        |
| <b>Ardau 2014 (2)</b>                  | 12                    | 6/12                         | incidence  | BD I+II                | R                           | case series     | 6                            | DSM IV             | DSM IV             | no                    | 58.3% (7/12) lithium            | n.a.                         | Cagliari, IT                   | 1976 - 2012 |
| <b>Austin 1992 (3)</b>                 | 17                    | 8/17                         | incidence  | BD                     | R                           | cohort          | 3                            | RDC 1978           | RDC 1978           | no                    | 41.2% (7/17) lithium            | 53% (9/17) lithium           | Edinburgh, UK                  | 1978 - 1988 |
| <b>Bagedahl 1998 (4)</b>               | 2                     | <u>2/4</u>                   | incidence  | PP                     | P                           | cohort          | 12                           | DSM IV             | Hospitalization    | yes                   | n.a.                            | n.a.                         | Stockholm, SE                  | 1976 - 1992 |
| <b>Benvenuti 1992 (5)</b>              | 7                     | 4/7                          | prevalence | PP                     | R                           | cohort          | 2                            | DSM III R          | DSM III            | yes                   | n.a.                            | n.a.                         | Florence, IT                   | 1973 - 1987 |
| <b>Bergink BD 2012<sup>i</sup> (6)</b> | 41                    | 9/41                         | incidence  | BD                     | P                           | cohort          | 3                            | DSM IV             | DSM IV             | yes                   | 75.6% (31/41) mostly lithium    | 88% (36/41) mostly lithium   | Rotterdam, NL                  | 2003 - 2010 |
| <b>Bergink PP 2012<sup>i</sup> (6)</b> | 29                    | 4/29                         | incidence  | PP                     | P                           | cohort          | 3                            | DSM IV             | DSM IV             | yes                   | 0%                              | 69% (20/29) mostly lithium   | Rotterdam, NL                  | 2003 - 2010 |
| <b>Bilszta 2010 (7)</b>                | 23                    | 3/23                         | incidence  | BD                     | P                           | cohort          | 2 & 6                        | DSM IV             | Clinical interview | yes                   | 65% (15/23) various             | n.a.                         | Melbourne, AU                  | n.a.        |
| <b>Blackmore 2006 (8)<sup>g</sup></b>  | 129                   | <u>167/242</u>               | incidence  | BD                     | R                           | cohort          | 1                            | DSM IV             | DSM IV             | yes                   | n.a.                            | n.a.                         | Birmingham, UK                 | n.a.        |
| <b>Blackmore 2013 (9)</b>              | 57                    | <u>37/67</u>                 | incidence  | PP                     | R                           | cohort          | 1                            | DSM IV/ICD 10      | DSM IV             | yes                   | 0%                              | n.a.                         | Birmingham, UK                 | n.a.        |
| <b>Blehar 1998 (10)</b>                | 139                   | 32/139                       | prevalence | BD I                   | R                           | cohort          | 1                            | DSM III R          | Clinical interview | yes                   | n.a.                            | n.a.                         | Multiple sites, US             | n.a.        |
| <b>Cohen 1995 (11)</b>                 | 27                    | 9/27                         | incidence  | BD                     | R                           | cohort          | 3                            | DSM III R          | Clinical interview | yes                   | n.a.                            | 51.9% (14/27) mostly lithium | Boston, US                     | n.a.        |
| <b>Colom 2010 (12)</b>                 | 109                   | 43/109                       | prevalence | BD                     | R                           | cohort          | 1                            | DSM IV             | DSM IV             | Yes                   | n.a.                            | n.a.                         | Barcelona, Spain               | 12 years    |
| <b>Di Florio 2013 (13)</b>             | 864                   | <u>786/1828</u>              | incidence  | BD I+II                | R                           | cohort          | 12                           | DSM IV             | DSM IV             | yes                   | n.a.                            | n.a.                         | Birmingham, UK                 | 1991 - 2010 |
| <b>Di Florio 2014 (14)</b>             | 1212                  | <u>1052/2329<sup>h</sup></u> | incidence  | BD I+II                | R                           | cohort          | 6                            | DSM IV             | DSM IV             | yes                   | n.a.                            | n.a.                         | Birmingham, UK                 | 1991 - 2010 |
| <b>Doyle 2012 (15)</b>                 | 43                    | 20/43                        | incidence  | BD                     | R                           | cohort          | 1                            | DSM IV             | DSM IV             | yes                   | 62% (26/42) various             | n.a.                         | Birmingham, UK                 | 2000 - 2009 |
| <b>Freeman 2002 (16)</b>               | 30                    | 20/30                        | prevalence | BD                     | R                           | cohort          | 1                            | DSM IV             | Clinical interview | no                    | 6.7% (2/30) valproate           | 3.3% (1/30) unknown          | Arizona, US                    | n.a.        |
| <b>Green 2008 (17)</b>                 | 15                    | 5/15                         | incidence  | BD                     | P                           | cohort          | 12                           | ICD 10             | Hospitalization    | yes                   | n.a.                            | n.a.                         | London, UK                     | 2002 - 2004 |
| <b>Grof 2000 (18)</b>                  | 28                    | 7/28                         | prevalence | BD I                   | R                           | cohort          | 9                            | RDC 1978           | RDC 1978           | no                    | 16% (4/25) <sup>l</sup>         | n.a.                         | Multiple sites AU,CZ,DK,DE,S E | n.a.        |

(Continued)

| Study <sup>a</sup>          | Patients included (n) | Event rate <sup>b,c</sup>      | Outcome    | Diagnosis <sup>d</sup> | Study Design I <sup>e</sup> | Study Design II | Duration follow up in months | Inclusion criteria | Relapse criteria   | Missing data reported | Medication use during pregnancy  | Medication use postpartum        | Cohort                  | Time Frame  |
|-----------------------------|-----------------------|--------------------------------|------------|------------------------|-----------------------------|-----------------|------------------------------|--------------------|--------------------|-----------------------|----------------------------------|----------------------------------|-------------------------|-------------|
| <b>Harlow 2007(19)</b>      | 786                   | 67/786                         | incidence  | BD                     | B                           | birth register  | 3                            | ICD 8,9,10         | Hospitalization    | yes                   | n.a.                             | n.a.                             | Birth register, SE      | 1987 - 2001 |
| <b>Hunt 1995 (20)</b>       | 36                    | <u>22/79</u>                   | incidence  | BD                     | R                           | cohort          | 3                            | RDC 1978           | RDC 1978           | yes                   | n.a.                             | n.a.                             | London, UK              | 1985 - 1987 |
| Jones 2001 (21)             | 152                   | 62,86/<br>152 <sup>b</sup>     | prevalence | BD                     | R                           | cohort          | 1 & 6                        | DSM IV             | DSM IV             | yes                   | n.a.                             | n.a.                             | Birmingham, UK          | 1991 - 2010 |
| <b>Kapfhammer 2014 (22)</b> | 23                    | <u>14/29</u>                   | incidence  | PP                     | R                           | cohort          | 1                            | DSM IV             | DSM IV             | yes                   | n.a.                             | n.a.                             | Munich, Germany         | 1975 - 1995 |
| <b>Kendell 1987 (23)</b>    | 33                    | <u>7/44</u>                    | incidence  | BD                     | P                           | cohort          | 3                            | ICD 8,9            | Hospitalization    | yes                   | n.a.                             | n.a.                             | Edinburgh, UK           | 1970 - 1981 |
| <b>Kirpinar 1999 (24)</b>   | 64                    | 25/64                          | prevalence | PP                     | R                           | cohort          | 3                            | DSM IV             | Clinical interview | yes                   | n.a.                             | n.a.                             | Erzurum, TR             | 1973 - 1994 |
| <b>Kumar 1993 (25)</b>      | 26                    | 17/26                          | incidence  | BD                     | P                           | cohort          | 3 & 6                        | RDC 1978           | RDC 1978           | yes                   | 0%                               | 0%                               | London, UK              | n.a.        |
| <b>Kumar 2003 (26)</b>      | 29                    | 12/29                          | incidence  | BD                     | P                           | clinical trial  | 3                            | RDC 1978           | RDC 1978           | yes                   | 0%                               | 100% estrogen <sup>i</sup>       | London, UK              | n.a.        |
| <b>Maina 2014 (27)</b>      | 276                   | 207/276                        | prevalence | BD I+II                | R                           | cohort          | 1                            | DSM IV             | DSM IV             | yes                   | 0%                               | n.a.                             | Turin, IT               | 1995 - 2009 |
| Marks 1992 (28)             | 26                    | 17/26                          | incidence  | BD                     | P                           | cohort          | 6                            | RDC 1978           | RDC 1978           | yes                   | 0%                               | 0%                               | London, UK              | n.a.        |
| <b>McNeil 1986 (29)</b>     | 18                    | 3/18                           | incidence  | PP                     | P                           | case control    | 6                            | RDC 1978           | RDC 1978           | yes                   | n.a.                             | n.a.                             | Southern Sweden, SE     | 1973 - 1977 |
| <b>Meakin 1995 (30)</b>     | 10                    | 3/10                           | incidence  | PP                     | P                           | cohort          | 1                            | RDC 1978           | Unknown            | yes                   | 0%                               | 0%                               | Leeds, UK               | n.a.        |
| <b>Munk-Olsen 2009 (31)</b> | 208                   | 37,46,<br>57/ 208 <sup>b</sup> | incidence  | BD                     | B                           | birth register  | 1,3, & 12                    | ICD 8, 10          | Hospitalization    | no                    | n.a.                             | n.a.                             | Birth register, DK      | 1973 - 2005 |
| <b>Pfuhlmann 1999 (32)</b>  | 4                     | 2/4                            | incidence  | BD                     | R                           | cohort          | 6                            | ICD 10             | Clinical interview | no                    | n.a.                             | n.a.                             | Wurzburg, DE            | 1981 - 1990 |
| Platz 1988 (33)             | n.a.                  | <u>2/11</u>                    | incidence  | BD                     | P                           | cohort          | 3                            | RDC 1978           | Hospitalization    | yes                   | n.a.                             | n.a.                             | Edinburgh, UK           | 1971 - 1977 |
| Robertson 2005 (34)         | 54                    | 31,36/<br>54 <sup>c,h</sup>    | incidence  | BD                     | R                           | cohort          | 1, 6                         | DSM IV             | DSM IV             | yes                   | n.a.                             | n.a.                             | Birmingham, UK          | n.a.        |
| <b>Rohde 1993 (35)</b>      | 31                    | 8/31                           | prevalence | PP                     | P                           | cohort          | 1                            | DSM III, DSM III R | Clinical interview | yes                   | n.a.                             | n.a.                             | Cologne and Bonn, DE    | 1950 - 1979 |
| <b>Schopf 1994 (36)</b>     | 42                    | 17/42                          | prevalence | PP                     | R                           | cohort          | 3                            | DSM III R          | Clinical interview | no                    | n.a.                             | n.a.                             | Lausanne/<br>Zurich, CH | 1949 - 1990 |
| <b>Sharma 2013 (37)</b>     | 37                    | 26/37                          | incidence  | BD II                  | P                           | cohort          | 12                           | DSM IV             | DSM IV             | yes                   | 46% (17/37) various <sup>i</sup> | 86% (32/37) various <sup>i</sup> | Ontario, CA             | n.a.        |
| <b>Sharma 2006 (38)</b>     | 25                    | 10/25                          | incidence  | BD                     | P                           | clinical trial  | 1                            | DSM IV             | DSM IV             | yes                   | n.a.                             | 68% (17/25) olanzapine           | Ontario, CA             | n.a.        |

(Continued)

| Study <sup>a</sup>        | Patients included (n) | Event rate <sup>b,c</sup>   | Outcome    | Diagnosis <sup>d</sup> | Study Design I <sup>e</sup> | Study Design II | Duration follow up in months | Inclusion criteria | Relapse criteria | Missing data reported | Medication use during pregnancy | Medication use postpartum  | Cohort                                        | Time Frame  |
|---------------------------|-----------------------|-----------------------------|------------|------------------------|-----------------------------|-----------------|------------------------------|--------------------|------------------|-----------------------|---------------------------------|----------------------------|-----------------------------------------------|-------------|
| <b>Sichel 1995 (39)</b>   | 7                     | 1/7                         | incidence  | PP                     | P                           | cohort          | 1,3, & 12                    | DSM III R          | DSM III          | yes                   | 0%                              | 100% estrogen <sup>i</sup> | Boston, USA                                   | n.a.        |
| <b>Stewart 1991 (40)</b>  | 21                    | 3/21                        | Incidence  | PP                     | P                           | clinical trial  | 6                            | RDC 1978           | Unknown          | no                    | 0% (0/21) lithium <sup>k</sup>  | 100% lithium               | Toronto, CA<br>Rotterdam, NL<br>Edinburgh, UK | n.a.        |
| <b>Terp 1999 (41)</b>     | 217                   | <u>49/266</u>               | incidence  | PP                     | B                           | birth register  | 3                            | ICD 8              | Hospitalization  | no                    | n.a.                            | n.a.                       | Birth register, DK                            | 1973 - 1993 |
| <b>Van Gent 1992 (42)</b> | 11                    | <u>6,10/16</u> <sup>b</sup> | incidence  | BD                     | P                           | cohort          | 3 & 12                       | DSM III            | Unknown          | yes                   | n.a.                            | 69% (11/16) mostly lithium | Utrecht, NL                                   | 1982 - 1989 |
| Videbech 1995 (43)        | 16                    | 4/16                        | prevalence | PP                     | B                           | birth register  | 12                           | ICD 8              | Hospitalization  | yes                   | n.a.                            | n.a.                       | Birth register, DK                            | 1973 - 1980 |
| <b>Viguera 2011 (44)</b>  | 621                   | <u>403/1120</u>             | incidence  | BD I+II                | R                           | cohort          | 6                            | DSM IV             | DSM IV           | no                    | n.a.                            | n.a.                       | Boston, VS<br>Sardinia/Rome, IT               | 1980 - 2010 |
| Viguera 2000 (45)         | 20                    | 14/20                       | incidence  | BD                     | R                           | cohort          | 6                            | DSM IV             | DSM IV           | no                    | 45% (9/20) lithium              | n.a.                       | Boston, VS<br>Sardinia, IT                    | n.a.        |
| Wieck 1991 (46)           | 15                    | 8/15                        | incidence  | BD                     | P                           | cohort          | 3                            | RDC 1978           | RDC 1978         | yes                   | n.a.                            | n.a.                       | London, UK                                    | n.a.        |
| Wieck 1989 (47)           | 15                    | 8/15                        | incidence  | BD                     | P                           | cohort          | 3                            | RDC 1978           | RDC 1978         | yes                   | n.a.                            | n.a.                       | London, UK                                    | n.a.        |
| <b>Wisner 2004 (48)</b>   | 26                    | 18/26                       | incidence  | BD                     | P                           | clinical trial  | 5                            | DSM IV             | DSM IV           | yes                   | 0%                              | 58% (15/26) valproate      | Pittsburgh, VS                                | 1996-1997   |

<sup>a</sup> Studies included in the quantitative meta-analysis are shown in bold.

<sup>b</sup> In case studies included more deliveries than patients the event rates are shown underlined.

<sup>c</sup> In case more event rates per study are shown, studies included more than one postpartum follow-up time points.

<sup>d</sup> BD = bipolar disorder; PP = history of postpartum psychosis

<sup>e</sup> R= retrospective; P = prospective; B= birth register study

<sup>f</sup> Study shown twice (BD and PP patient sample).

<sup>g</sup> Sample selected on a history of postpartum relapse (study not included in quantitative synthesis).

<sup>h</sup> In a small subset of patients the onset (pregnancy or postpartum) of relapse episodes was unknown (study not included in quantitative synthesis).

<sup>i</sup> Data on medication was not stratified for relapse. Therefore, these studies were not included in the pharmacotherapy analyses.

<sup>j</sup> Since estrogen is not commonly used as prophylactic medication, these studies were not included in the pharmacotherapy analyses.

<sup>k</sup> In 5 patients prophylactic therapy was started at the end of the third trimester.

## References

1. Akdeniz F, Vahip S, Pirildar S, Vahip I, Doganer I, Bulut I. Risk factors associated with childbearing-related episodes in women with bipolar disorder. *Psychopathology*. 2003;36:234-238.
2. Arda R, Bocchetta A, Carta P, Chillotti C, Deiana V, Del Zompo M, et al. A retrospective case series of bipolar patients during pregnancy: lithium prophylaxis, risk of recurrences and maternal/neonatal complications. *International Journal of Psychiatry in Clinical Practice*. 2014;16:21-22.
3. Austin MPV. Puerperal affective psychosis: Is there a case for lithium prophylaxis? *Br J Psychiatry*. 1992;161:692-694.
4. Bagedahl-Strindlund M, Ruppert S. Parapartum mental illness: a long-term follow-up study. *Psychopathology*. 1998;31:250-259.
5. Benvenuti P, Cabras PL, Servi P, Rosseti S, Marchetti G, Pazzagli A. Puerperal psychoses: A clinical case study with follow-up. *J Affect Disord*. 1992;26:25-30.
6. Bergink V, Bouvy PF, Vervoort JSP, Koorengel KM, Steegers EAP, Kushner SA. Prevention of postpartum psychosis and mania in women at high risk. *Am J Psychiatry*. 2012;169:609-615.
7. Bilszta JLC, Meyer D, Buist AE. Bipolar affective disorder in the postnatal period: investigating the role of sleep. *Bipolar Disord*. 2010;12:568-578.
8. Blackmore ER, Jones I, Doshi M, Haque S, Holder R, Brockington I, et al. Obstetric variables associated with bipolar affective puerperal psychosis. *Br J Psychiatry*. 2006;188:32-36.
9. Blackmore ER, Rubinow DR, O'Connor TG, Liu X, Tang W, Craddock N, et al. Reproductive outcomes and risk of subsequent illness in women diagnosed with postpartum psychosis. *Bipolar Disord*. 2013;15:394-404.
10. Blehar MC, DePaulo JR, Jr., Gershon ES, Reich T, Simpson SG, Nurnberger JI, Jr. Women with bipolar disorder: findings from the NIMH Genetics Initiative sample. *Psychopharmacol Bull*. 1998;34:239-243.
11. Cohen LS, Sichel DA, Robertson LM, Heckscher E, Rosenbaum JF. Postpartum prophylaxis for women with bipolar disorder. *Am J Psychiatry*. 1995;152:1641-1645.
12. Colom F, Cruz N, Pacchiarotti I, Mazzarini L, Goikolea JM, Popova E, et al. Postpartum bipolar episodes are not distinct from spontaneous episodes: implications for DSM-V. *J Affect Disord*. 2010;126:61-64.
13. Di Florio A, Forty L, Gordon-Smith K, Heron J, Jones L, Craddock N, et al. Perinatal episodes across the mood disorder spectrum. *Jama Psychiatry*. 2013;70:168-175.
14. Di Florio A, Jones L, Forty L, Gordon-Smith K, Robertson Blackmore E, Heron J, et al. Mood disorders and parity - A clue to the aetiology of the postpartum trigger. *J Affective Disord*. 2014;152-154:334-339.
15. Doyle K, Heron J, Berrisford G, Whitmore J, Jones L, Wainscott G, et al. The management of bipolar disorder in the perinatal period and risk factors for postpartum relapse. *Eur Psychiatry*. 2012;27:563-569.
16. Freeman MP, Wosnitzer Smith K, Freeman SA, McElroy SL, Kmetz GF, Wright R, et al. The impact of reproductive events on the course of bipolar disorder in women. *J Clin Psychiatry*. 2002;63:284-287.
17. Green L, Elliott S, Anwar L, Best E, Tero M, Sarkar A, et al. An audit of pregnant women with severe mental illness referred during the first 2 years of a new perinatal mental health service. *Arch Women's Ment Health*. 2008;11:149-158.
18. Grof P, Robbins W, Alda M, Berghoefter A, Vojtechovsky M, Nilsson A, et al. Protective effect of pregnancy in women with lithium-responsive bipolar disorder. *J Affective Disord*. 2000;61:31-39.
19. Harlow BL, Vitonis AF, Sparen P, Cnattingius S, Joffe H, Hultman CM. Incidence of hospitalization for postpartum psychotic and bipolar episodes in women with and without prior prepregnancy or prenatal psychiatric hospitalizations. *Arch Gen Psychiatry*. 2007;64:42-48.

20. Hunt N. Does puerperal illness distinguish a subgroup of bipolar patients? *J Affect Disord.* 1995;34:101-107.
21. Jones I, Craddock N. Familiality of the puerperal trigger in bipolar disorder: Results of a family study. *American Journal of Psychiatry.* 2001;158:913-917.
22. Kapfhammer HP, Reininghaus EZ, Fitz W, Lange P. Clinical course of illness in women with early onset puerperal psychosis: a 12-year follow-up study. *J Clin Psychiatry.* 2014;75:1096-1104.
23. Kendell RE, Chalmers JC, Platz C. Epidemiology of puerperal psychoses. *Br J Psychiatry.* 1987;150:662-673.
24. Kirpinar I, Coskun I, Caykoylu A, Anac S, Ozer H. First-case postpartum psychoses in Eastern Turkey: A clinical case and follow-up study. *Acta Psychiatr Scand.* 1999;100:199-204.
25. Kumar R, Marks M, Wieck A, Hirst D, Campbell I, Checkley S. Neuroendocrine and psychosocial mechanisms in post-partum psychosis. *Prog Neuro-Psychopharmacol Biol Psychiatry.* 1993;17:571-579.
26. Kumar C, Mclvor RJ, Davies T, Brown N, Papadopoulos A, Wieck A, et al. Estrogen administration does not reduce the rate of recurrence of affective psychosis after childbirth. *J Clin Psychiatry.* 2003;64:112-118.
27. Maina G, Rosso G, Aguglia A, Bogetto F. Recurrence rates of bipolar disorder during the postpartum period: a study on 276 medication-free Italian women. *Arch Womens Ment Health.* 2014;17:367-372.
28. Marks MN, Wieck A, Checkley SA, Kumar R. Contribution of psychological and social factors to psychotic and non-psychotic relapse after childbirth in women with previous histories of affective disorder. *J Affect Disord.* 1992;24:253-263.
29. McNeil TF. A prospective study of postpartum psychoses in a high-risk group. I. Clinical characteristics of the current postpartum episodes. *Acta Psychiatr Scand.* 1986;74:205-216.
30. Meakin CJ, Brockington IF, Lynch S, Jones SR. Dopamine supersensitivity and hormonal status in puerperal psychosis. *Br J Psychiatry.* 1995;166:73-79.
31. Munk-Olsen T, Laursen TM, Mendelson T, Pedersen CB, Mors O, Mortensen PB. Risks and predictors of readmission for a mental disorder during the postpartum period. *Arch Gen Psychiatry.* 2009;66:189-195.
32. Pfuhlmann B, Franzek E, Beckmann H, Stober G. Long-term course and outcome of severe postpartum psychiatric disorders. *Psychopathology.* 1999;32:192-202.
33. Platz C, Kendell RE. A matched-control follow-up and family study of 'puerperal psychoses'. *Br J Psychiatry.* 1988;153:90-94.
34. Robertson E, Jones I, Haque S, Holder R, Craddock N. Risk of puerperal and non-puerperal recurrence of illness following bipolar affective puerperal (post-partum) psychosis. *Br J Psychiatry.* 2005;186:258-259.
35. Rohde A, Marneros A. Postpartum psychoses: Onset and long-term course. *Psychopathology.* 1993;26:203-209.
36. Schopf J, Rust B. Follow-up and family study of postpartum psychoses - Part I: Overview. *Eur Arch Psychiatry Clin Neurosci.* 1994;244:101-111.
37. Sharma V, Sommerdyk C, Xie B, Campbell K. Pharmacotherapy of bipolar II disorder during and after pregnancy. *Curr Clin Pharmacol.* 2013;8:246-252.
38. Sharma V, Smith A, Mazmanian D. Olanzapine in the prevention of postpartum psychosis and mood episodes in bipolar disorder. *Bipolar Disord.* 2006;8:400-404.
39. Sichel DA, Cohen LS, Robertson LM, Rutenber A, Rosenbaum JF. Prophylactic estrogen in recurrent postpartum affective disorder. *Biol Psychiatry.* 1995;38:814-818.
40. Stewart DE, Klompenhouwer JL, Kendell RE, Van Hulst AM. Prophylactic lithium in puerperal psychosis. The experience of three centres. *Br J Psychiatry.* 1991;158:393-397.

41. Terp IM, Engholm G, Moller H, Mortensen PB. A follow-up study of postpartum psychoses: Prognosis and risk factors for readmission. *Acta Psychiatr Scand.* 1999;100:40-46.
42. Van Gent EM, Verhoeven WMA. Bipolar illness, lithium prophylaxis, and pregnancy. *Pharmacopsychiatry.* 1992;25:187-191.
43. Videbech P, Gouliaev G. First admission with puerperal psychosis: 7-14 years of follow-up. *Acta Psychiatr Scand.* 1995;91:167-173.
44. Viguera AC, Tondo L, Koukopoulos AE, Reginaldi D, Lepri B, Baldessarini RJ. Episodes of mood disorders in 2,252 pregnancies and postpartum periods. *Am J Psychiatry.* 2011;168:1179-1185.
45. Viguera AC, Nonacs R, Cohen LS, Tondo L, Murray A, Baldessarini RJ. Risk of recurrence of bipolar disorder in pregnant and nonpregnant women after discontinuing lithium maintenance. *Am J Psychiatry.* 2000;157:179-184.
46. Wieck A, Kumar R, Hirst AD, Marks MN, Campbell IC, Checkley SA. Increased sensitivity of dopamine receptors and recurrence of affective psychosis after childbirth. *Br Med J.* 1991;303:613-616.
47. Wieck A, Hirst AD, Marks MN, Checkley SA, Campbell IC, Kumar R. The Growth-Hormone Response to the Dopamine Agonist Apomorphine Is Enhanced in Women at High-Risk of Puerperal Psychosis. *British Journal of Clinical Pharmacology.* 1989;28:P748-P748.
48. Wisner KL, Hanusa BH, Peindl KS, Perel JM. Prevention of postpartum episodes in women with bipolar disorder. *Biol Psychiatry.* 2004;56:592-596.

FIGURE S1. Funnel Plot of Standard Error by Logit Event Rate in Quantitative Synthesis

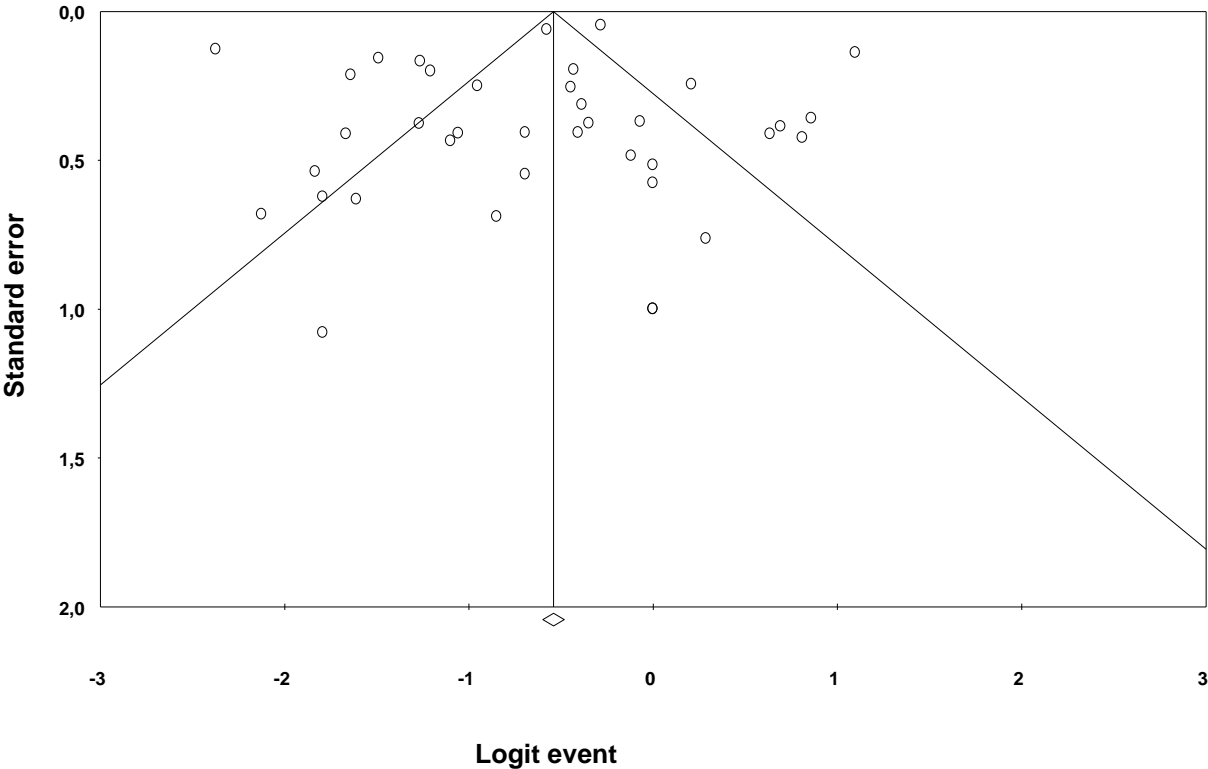

Supplement: appi.ajp.2015.15010124.ds001.pdf [file appi.ajp.2015.15010124.ds001.pdf]
